# Supplementary material for: Biochemical Characterization of Different Chemical Components of Parthenium hysterophorus and Their Therapeutic Potential against HIV‐1 RT and Microbial Growth
Source: Hindawi journal article supplement (doi:10.1155/2022/3892352), 2022-01-01
Supplement: f1 [file 3892352.f1.pdf]

## Supplementary Materials

### **Biochemical Characterization of different Chemical Components of *Parthenium hysterophorus* and their Therapeutic Potential against HIV-1 RT and Microbial growth**

Jyotsna Jaiswal<sup>1</sup>, Pawan Kumar Doharey<sup>1</sup>, Reetika Singh<sup>1</sup>, Priyanka Tiwari<sup>1</sup>, Nitika Singh<sup>1</sup>, Abhishek Kumar<sup>1</sup>, Vivek KumarGupta<sup>1</sup>, Arif Jamal Siddiqui<sup>2</sup>, Bechan Sharma<sup>1\*</sup>

<sup>1</sup>Department of Biochemistry, Faculty of Science, University of Allahabad, Prayagraj-211002, India.

<sup>2</sup>Department of Biology, College of Science, University of Hail, Hail, P.O. Box 2440, Saudi Arabia.

\*Corresponding author: Email: [sharmabi@yahoo.com](mailto:sharmabi@yahoo.com); Contact: +91-9415715639  
Co-corresponding author: [arifjamal13@gmail.com](mailto:arifjamal13@gmail.com)

### **Supplementary Tables**

**SUPPLEMENTARY TABLE 1:** A summary of analysis of different absorption peaks generated due to absorption of light in the UV-Visible regions by different phytochemicals present in the extracts of leaves, stem, and flowers of *P. hysterophorus* in varying solvents at high temperature (equivalent to their boiling points)

| Plant name                      | Part of plant | Solvents      | Extract (mg/ml) | No. of peaks  | Wavelength                           | Probable phytochemical               | Reference |
|---------------------------------|---------------|---------------|-----------------|---------------|--------------------------------------|--------------------------------------|-----------|
| <i>Parthenium hysterophorus</i> | Leaf          | Hexane        | 5 mg/ml         | 4             | 229, 340, 410, 669                   | Terpenoids, Flavonoids, Pheophytin A | [27, 28]  |
|                                 |               |               | 250µg/ml        | 4             | 229, 340, 410, 669                   | Terpenoids, Flavonoids, Pheophytin A | [27, 28]  |
|                                 |               | Ethyl acetate | 5 mg/ml         | 3             | 415, 697                             | Flavonoids, Pheophytin A             | [27, 28]  |
|                                 |               |               | 250µg/ml        | 3             | 407, 697                             | Flavonoids, Pheophytin A             | [27, 28]  |
|                                 |               | Methanol      | 5 mg/ml         |               | 345, 389, 669                        | Flavonoids, Pheophytin A             | [27, 28]  |
|                                 |               |               | 250µg/ml        |               | 331, 408, 664                        | Flavonoids, Pheophytin A             | [27, 28]  |
|                                 | Aqueous       | 5 mg/ml       |                 | 231, 337, 360 | Terpenoids, Flavonoids, Pheophytin A | [27, 28]                             |           |
|                                 |               | 250µg/ml      |                 | 201           | Unsaturated carbonyl compounds       | Not any                              |           |
|                                 | Stem          | Hexane        | 5 mg/ml         | 3             | 351, 410, 669                        | Flavonoids, Pheophytin A             | [27, 28]  |

|        |               |          |   |                  |      |                                            |          |
|--------|---------------|----------|---|------------------|------|--------------------------------------------|----------|
|        |               | 250µg/ml | 3 | 226,<br>,669     | 410  | Terpenoids,<br>Flavonoids,<br>Pheophytin A | [27, 28] |
|        | Ethyl acetate | 5 mg/ml  |   | 402,<br>655      | 648, | Flavonoids,                                | [27, 28] |
|        |               | 250µg/ml |   | 484,<br>697      | 576, | Flavonoids,<br>Pheophytin A                | [27, 28] |
|        | Methanol      | 5 mg/ml  |   | 317,<br>669      | 379, | Flavonoids,<br>Pheophytin A                | [27, 28] |
|        |               | 250µg/ml |   | 496              |      | Flavonoids,                                | [27]     |
|        | Aqueous       | 5 mg/ml  |   | 335, 350         |      | Flavonoids,                                | [27]     |
|        |               | 250µg/ml |   | 210, 214         |      | Unsaturated<br>carbonyl<br>compounds       | Not any  |
| Flower | Hexane        | 5 mg/ml  | 3 | 365,<br>670      | 385, | Flavonoids,<br>Pheophytin A                | [27, 28] |
|        |               | 250µg/ml | 3 | 226,<br>669      | 411, | Terpenoids,<br>Flavonoids,<br>Pheophytin A | [27, 28] |
|        | Ethyl acetate | 5 mg/ml  | 3 | 367, 427,<br>664 |      | Flavonoids,<br>Pheophytin A                | [27, 28] |
|        |               | 250µg/ml | 3 | 484,<br>697      | 576, | Flavonoids,<br>Pheophytin A                | [27, 28] |
|        | Methanol      | 5 mg/ml  | 3 | 207,<br>669      | 384, | Flavonoids,<br>Pheophytin A                | [27, 28] |
|        |               | 250µg/ml | 1 | 207              |      | Unsaturated<br>carbonyl<br>compounds       | Not any  |
|        | Aqueous       | 5 mg/ml  | 2 | 330, 352         |      | Flavonoids                                 | [27]     |
|        |               | 250µg/ml | 1 | 203              |      | Unsaturated<br>carbonyl<br>compounds       | Not any  |

The phytochemicals shown in the Table comprise a family of compounds which show absorbance of light at different wavelengths in UV-visible regions.

The results of spectrophotometric analysis of different phytochemicals present in different extracts of leaves, stem and, flowers prepared at room temperature ( $24\pm 2^{\circ}\text{C}$ ) are presented in Supplementary Table 2.

**SUPPLEMENTARY TABLE 2:** A summary of analysis of different absorption peaks generated due to absorption of light in the UV-Visible regions by different phytochemicals present in the extracts of leaves, stem and flowers of *P. hysterophorus* in varying solvents at low temperature (equivalent to room temperature i.e.,  $24\pm 2^{\circ}\text{C}$ )

| Plant name                      | Part of plant | Solvents      | Extract (mg/ml) | No. of peaks | Wavelength                     | Probable phytochemical         | Reference |
|---------------------------------|---------------|---------------|-----------------|--------------|--------------------------------|--------------------------------|-----------|
| <i>Parthenium hysterophorus</i> | Leaf          | Hexane        | 5 mg/ml         | 5            | 380, 410, 533, 669             | Flavonoids, Pheophytin A       | [27, 28]  |
|                                 |               |               | 250µg/ml        | 4            | 399, 670                       | Flavonoids, Pheophytin A       | [27, 28]  |
|                                 |               | Ethyl acetate | 5 mg/ml         | 3            | 415, 655                       | Flavonoids, Pheophytin A       | [27, 28]  |
|                                 |               |               | 250µg/ml        | 3            | 402, 576, 654                  | Flavonoids                     | [27]      |
|                                 |               | Methanol      | 5 mg/ml         | 3            | 340, 399, 667                  | Flavonoids, Pheophytin A       | [27, 28]  |
|                                 |               |               | 250µg/ml        | 2            | 218, 331                       | Flavonoids, Pheophytin A       | [27, 28]  |
|                                 |               | Aqueous       | 5 mg/ml         | 2            | 194, 329, 374                  | Flavonoids                     | [27]      |
|                                 |               |               | 250µg/ml        |              | 201                            | Unsaturated carbonyl compounds | Not any   |
|                                 | Stem          | Hexane        | 5 mg/ml         | 3            | 399, 670                       | Flavonoids, Pheophytin A       | [27, 28]  |
|                                 |               |               | 250µg/ml        | 3            | 410, 669                       | Flavonoids, Pheophytin A       | [27, 28]  |
|                                 |               | Ethyl acetate | 5 mg/ml         |              | 388, 653                       | Flavonoids                     | [27]      |
|                                 |               |               | 250µg/ml        |              | 576, 697                       | Flavonoids, Pheophytin A       | [27, 28]  |
|                                 |               | Methanol      | 5 mg/ml         |              | 210, 342                       | Flavonoids, Pheophytin A       | [27, 28]  |
|                                 |               |               | 250µg/ml        |              | 208                            | Flavonoids                     | [27]      |
| Aqueous                         |               | 5 mg/ml       |                 | 225, 331     | Flavonoids                     | [27]                           |           |
|                                 |               | 250µg/ml      |                 | 209          | Unsaturated carbonyl compounds | Not any                        |           |
| Flow                            | Hexane        | 5 mg/ml       | 3               | 384, 670     | Flavonoids, Pheophytin A       | [27, 28]                       |           |
|                                 |               | 250µg/ml      | 3               | 307, 669     | Flavonoids,                    | [27, 28]                       |           |

| er            |          | Pheophytin A |          |      |                                |          |  |
|---------------|----------|--------------|----------|------|--------------------------------|----------|--|
| Ethyl acetate | 5 mg/ml  | 3            | 379, 667 | 402, | Flavonoids, Pheophytin A       | [27, 28] |  |
|               | 250µg/ml | 2            | 402, 669 |      | Flavonoids, Pheophytin A       | [27, 28] |  |
| Methanol      | 5 mg/ml  | 3            | 346, 669 | 383, | Flavonoids, Pheophytin A       | [27, 28] |  |
|               | 250µg/ml | 1            | 213      |      | Unsaturated carbonyl compounds | [27, 28] |  |
| Aqueous       | 5 mg/ml  | 2            | 330, 352 |      | Flavonoids                     | [27, 28] |  |
|               | 250µg/ml | 1            | 203      |      | Unsaturated carbonyl compounds | Not any  |  |

The phytochemicals shown in the Table comprise a family of compounds which show absorbance of light at different wavelengths in UV-visible regions.

**SUPPLEMENTARY TABLE 3:** IC<sub>50</sub> values for total antioxidant capacity of *P. hysterochorus* extracts prepared in high and low temperatures in different solvents

| <i>P. hysterochorus</i> | Solvent       | IC <sub>50</sub> (µg/ml) of extracts |                  |
|-------------------------|---------------|--------------------------------------|------------------|
|                         |               | Low temperature                      | High Temperature |
| Leaf                    | Hexane        | 27                                   | 29               |
|                         | Ethyl acetate | 15                                   | 10               |
|                         | Methanol      | 39                                   | 8                |
|                         | Aqueous       | 14                                   | 9                |
| Stem                    | Hexane        | 13                                   | 40               |
|                         | Ethyl acetate | 13                                   | 25               |
|                         | Methanol      | 24                                   | 36               |
|                         | Aqueous       | 14                                   | 15               |
| Flower                  | Hexane        | 28                                   | 41               |
|                         | Ethyl acetate | 28                                   | 30               |
|                         | Methanol      | 40                                   | 12               |
|                         | Aqueous       | 13                                   | 30               |

**SUPPLEMENTARY TABLE 4:** Reduction potential of the *P. hysterochorus* plant extracts prepared at high and low temperatures

| S. No. | <i>P. hysterophorus</i>       | Solvent       | Redox potential<br>Equivalent to Vit-C<br>( $\mu\text{g} / \text{mg}$ Extract) |
|--------|-------------------------------|---------------|--------------------------------------------------------------------------------|
| 1      | Leaf (Low temperature, RT)    | Hexane        | 36                                                                             |
| 2      |                               | Ethyl acetate | 52                                                                             |
| 3      |                               | Methanol      | 64                                                                             |
| 4      |                               | Aqueous       | 40                                                                             |
| 5      | Leaf (High temperature, HT)   | Hexane        | 30.4                                                                           |
| 6      |                               | Ethyl acetate | 60                                                                             |
| 7      |                               | Methanol      | 75                                                                             |
| 8      |                               | Aqueous       | 75                                                                             |
| 9      | Stem (Low temperature, RT)    | Hexane        | 27                                                                             |
| 10     |                               | Ethyl acetate | 27                                                                             |
| 11     |                               | Methanol      | 67.2                                                                           |
| 12     |                               | Aqueous       | 52                                                                             |
| 13     | Stem (High temperature, HT)   | Hexane        | 41                                                                             |
| 14     |                               | Ethyl acetate | 36                                                                             |
| 15     |                               | Methanol      | 73.6                                                                           |
| 16     |                               | Aqueous       | 67.2                                                                           |
| 17     | Flower (Low temperature, RT)  | Hexane        | 43.2                                                                           |
| 18     |                               | Ethyl acetate | 22.4                                                                           |
| 19     |                               | Methanol      | 64                                                                             |
| 20     |                               | Aqueous       | 83                                                                             |
| 21     | Flower (High temperature, HT) | Hexane        | 38                                                                             |
| 22     |                               | Ethyl acetate | 12                                                                             |
| 23     |                               | Methanol      | 131.2                                                                          |
| 24     |                               | Aqueous       | 70                                                                             |

### Supplementary Figures

### Supplementary Figure 1:

#### Leaf

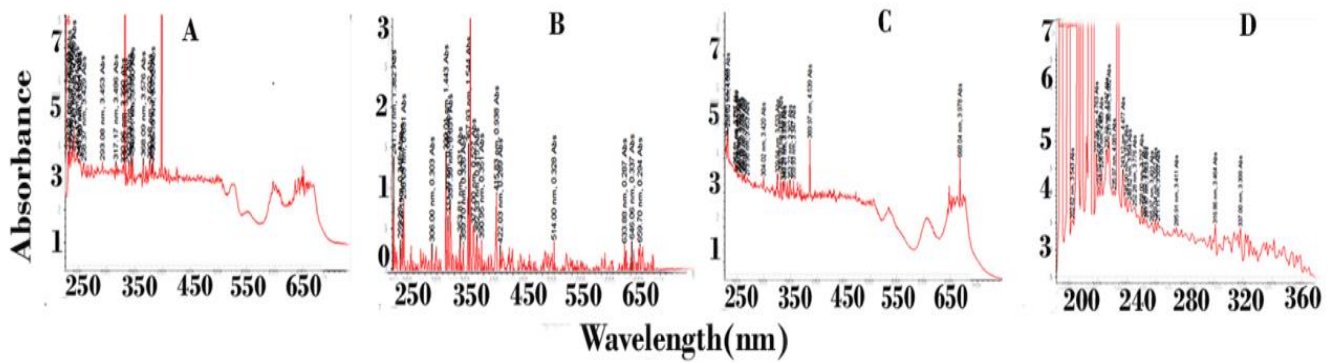

#### Stem

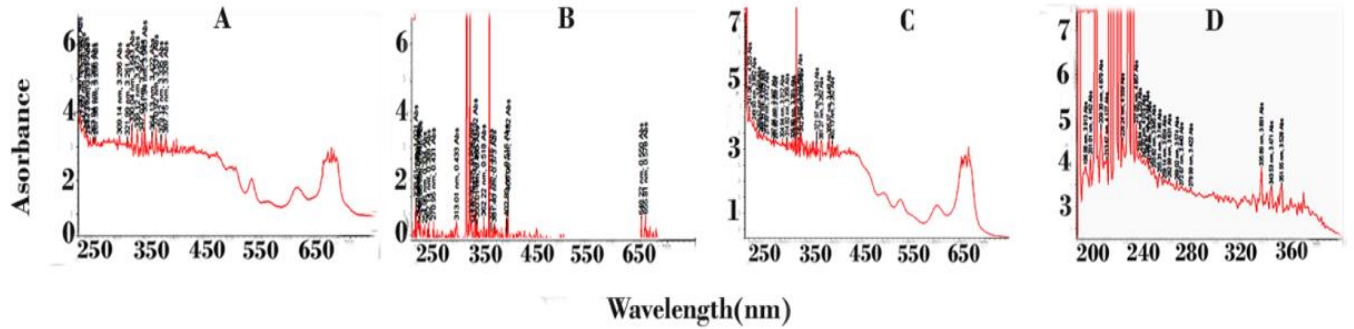

#### Flower

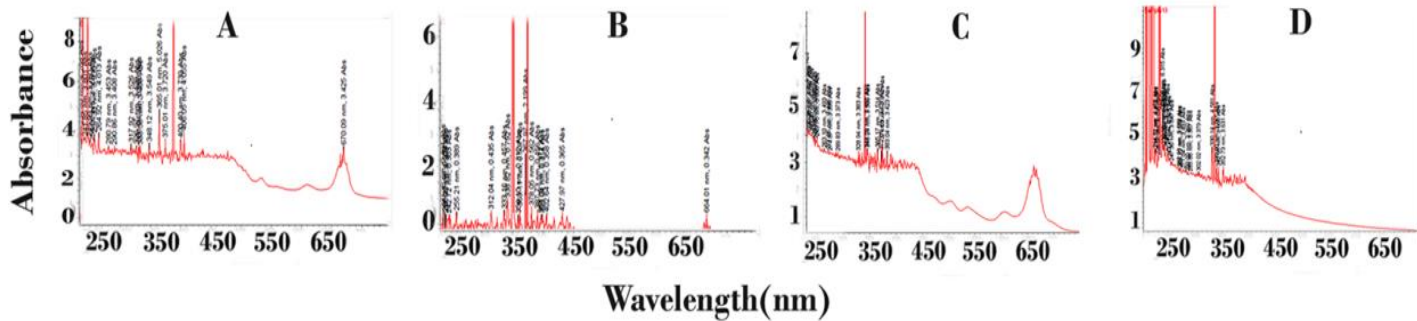

**Supplementary Figure 1:** Spectrophotometric analysis of the extracts of leaves, stem and flowers of *P. hysterophorus* prepared in different solvents at high temperature using Soxhlet apparatus showing their varying absorption abilities of light in the UV-Visible range. Solvents used were A=Hexane, B= Ethyl acetate, C=Methanol, and D=Aqueous

### Supplementary Figure 2:

## Leaf

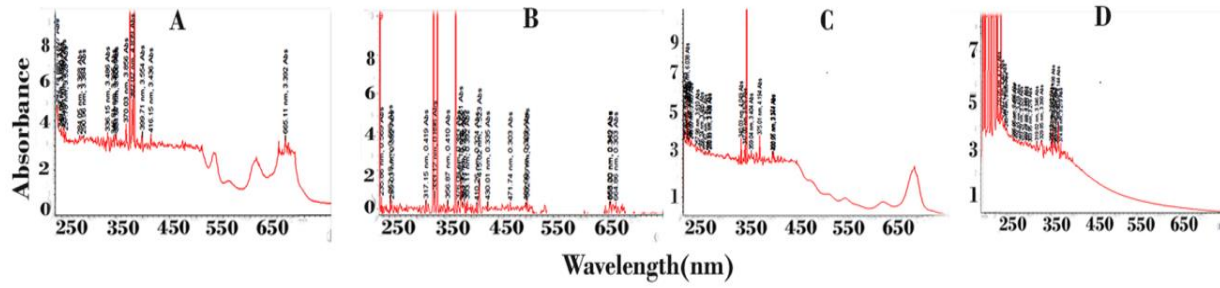

## Stem

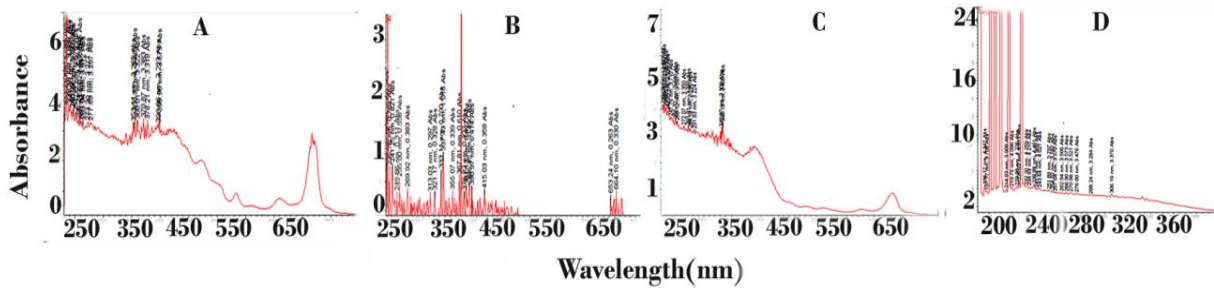

## Flower

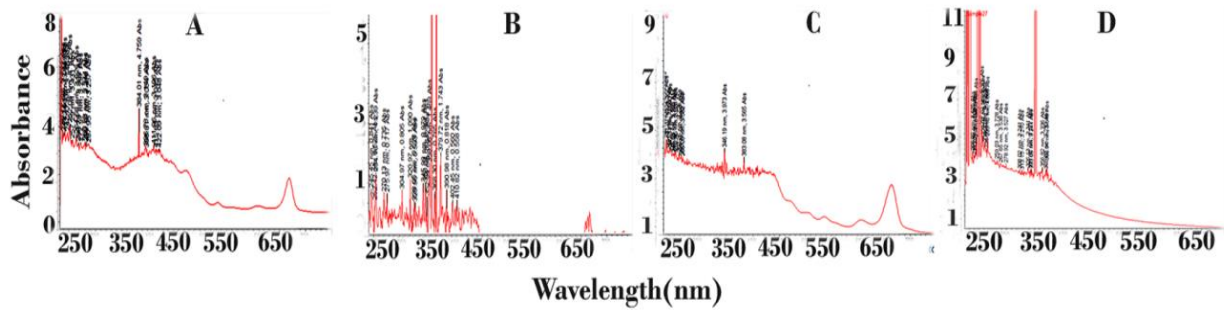

**Supplementary Figure 2:** Spectrophotometric analysis of the extracts of leaves, stem and flowers of *P. hysterophorus* prepared in different solvents at low temperature using Soxhlet apparatus showing their varying absorption abilities of light in the UV-Visible range. Solvents used were A=Hexane, B= Ethyl acetate, C=Methanol, and D=Aqueous
